# Supplementary material for: A firefly inspired one-pot chemiluminescence system using n-propylphosphonic anhydride (T3P)
Source: Royal Society of Chemistry journal article supplement (doi:10.1039/c4pp00250d), 2014-10-10

## SUPPLEMENTAL DATA

### Firefly inspired one-pot chemiluminescence system using *n*-propylphosphonic anhydride (T3P)

**Dai-ichiro Kato,<sup>\*a</sup> Daiki Shirakawa,<sup>a</sup> Robin Polz,<sup>b</sup> Mika Maenaka,<sup>a</sup> Masahiro Takeo,<sup>a</sup> Seiji Negoro,<sup>a</sup> and Kazuki Niwa<sup>c</sup>**

<sup>a</sup> *Department of Materials Science and Chemistry, Graduate School of Engineering, University of Hyogo, 2167 Shosha, Himeji, Hyogo, 671-2280, Japan*

<sup>b</sup> *Faculty of Chemistry, Bielefeld University, Universitätsstraße 25, 33615 Bielefeld, Germany*

<sup>c</sup> *National Institute of Advanced Industrial Science and Technology (AIST), Tsukuba, Ibaraki, 305 -8563, Japan*

\* Corresponding author. Tel/Fax.: +81 79 267 4969.

E-mail address: kato@eng.u-hyogo.ac.jp (D. Kato).

#### HPLC separation condition

- Column: Mightysil RP-18GP Aqua 250-4.6 (5 mm) (Kanto Corp., Tokyo, Japan)
- Mobile Phase: Solvent A: 0.1% TFA in water, Solvent B: 0.1% TFA in 90% acetonitrile
- Gradient: 0-5 min, 0%B; 5-15 min, 0-30%B; 15-40 min, 30%B; 40-55 min, 100%B,  
55-60 min, 0%B
- Flow rate: 0.5 mL/min.
- Temperature: 40 °C
- Detection: ex 330 nm, em 510 nm

1) Before the reaction (D-luc)

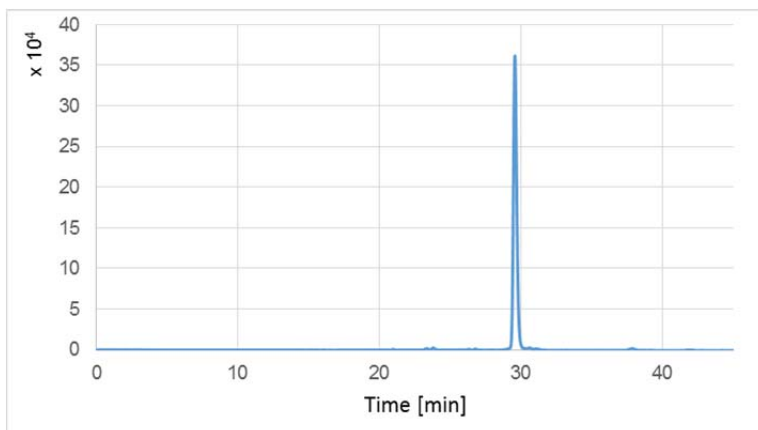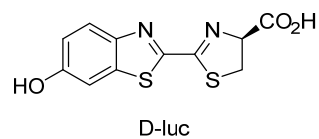

2) After the T3P chemiluminescence reaction

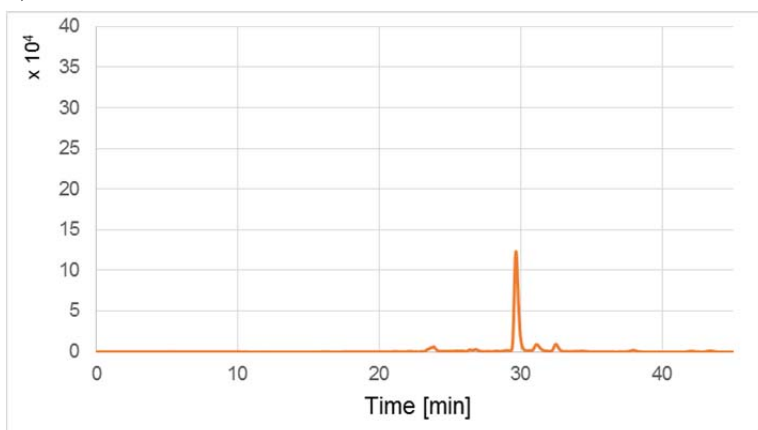

3) dehydroluciferin

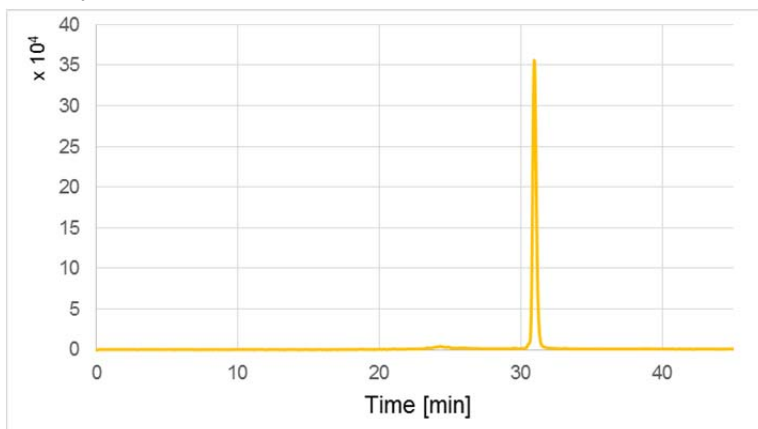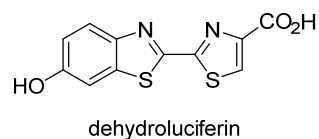

4) 2-cyano-6-hydroxybenzothiazole

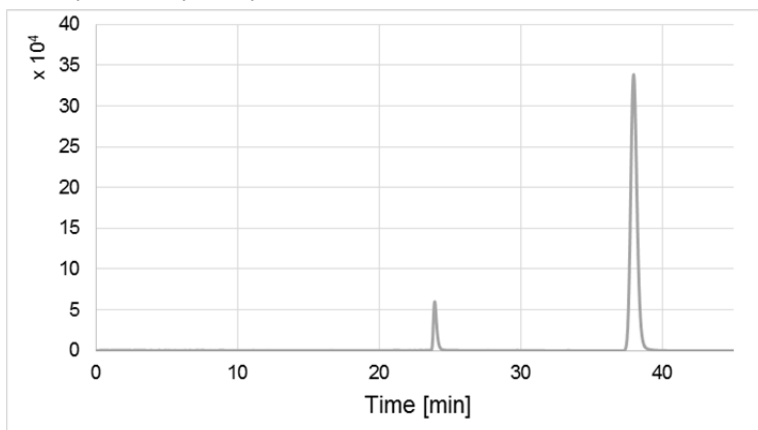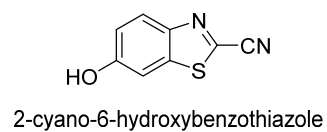

Supplement: c4pp00250d1.pdf [file c4pp00250d1.pdf]
